# Supplementary material for: New antimony fluorooxoborates with strong birefringence and unprecedented structural characterisation
Source: Royal Society of Chemistry journal article supplement (doi:10.1039/d3cc05784d), 2024-01-01
Supplement: d3cc05784d1.pdf [file d3cc05784d1.pdf]

## **New Antimony Fluorooxoborates with Great Birefringence and Unprecedented Structural Characterisation**

Chenhui Hu,<sup>a,b</sup> Mengfan Wu,<sup>a,b</sup> Jian Han,<sup>a,b,\*</sup> Zihua Yang,<sup>a,b</sup> Shujuan Han<sup>a,b</sup> and  
Shilie Pan<sup>a,b,\*</sup>

<sup>a</sup> Research Center for Crystal Materials; CAS Key Laboratory of Functional Materials and Devices for Special Environments; Xinjiang Technical Institute of Physics and Chemistry, CAS, 40-1 South Beijing Road, Urumqi 830011, China.

<sup>b</sup> Center of Materials Science and Optoelectronics Engineering, University of Chinese Academy of Sciences, Beijing 100049, China.

\* Corresponding authors: hanjian@ms.xjb.ac.cn and slpan@ms.xjb.ac.cn.

## EXPERIMENTAL METHODOLOGY

### 1. Synthesis.

Crystals of  $\text{SbB}_2\text{O}_4\text{F}$  were obtained by a high-temperature solution method in a closed system. The raw materials  $\text{SbF}_3$ ,  $\text{B}_2\text{O}_3$ , and  $\text{H}_3\text{BO}_3$  at a molar ratio of 3:6:2 were placed in a fused-silica tube ( $\Phi 10 \text{ mm} \times 150 \text{ mm}$ ) and mixed in sealed quartz tubes under  $10^{-3} \text{ Pa}$  at a medium temperature of 653 K.

### 2. Characterizations.

High-quality crystals were picked under an optical microscope (OM) and applied for the measurements of single-crystal X-ray diffraction. The experiments were carried out at room temperature on a Bruker D8 Venture diffractometer with monochromatic Mo  $K\alpha$  radiation ( $\lambda = 0.71073 \text{ \AA}$ ). The diffraction data were integrated using the SAINT program. Meanwhile, multiscan-type absorption corrections were performed using the SADABS program. To determine the space groups, the XPREP program in the SHELXTL package was used.<sup>[1]</sup> The crystal structure of  $\text{SbB}_2\text{O}_4\text{F}$  was solved by the direct method, and refined using  $F^2$  full matrix least squares. Then, the structure was checked by the PLATON program.<sup>[2-3]</sup> The bond valence sum (BVS) calculations were shown for verifying structural correctness.<sup>[4]</sup> Energy Dispersive X-ray Spectroscopy (EDS) was measured on a SUPRA 55VP field emission scanning electron microscope equipped with a BRUKER X-ray Flash-SDD-5010 energy-dispersive X-ray spectroscopy.

### 3. Calculations

The theoretical calculations of  $\text{SbB}_2\text{O}_4\text{F}$  are performed using the plane wave density functional theory (DFT) package CASTEP.<sup>[5, 6]</sup> The exchange-correlation functional was treated by the generalized gradient approximation (GGA) in the formulation of Perdew-Burke-Ernzerhoff (PBE) functional, and core-valence interactions were described by norm-conserving pseudopotentials (NCP).<sup>[7, 8]</sup> Because GGA usually underestimates the bandgap owing to the discontinuity of exchange-correlation energy, the Heyd-Scuseria-Ernzerhof (HSE06) hybrid functional<sup>[9]</sup> was chosen to provide more accurate band gap values. Therefore, the bandgap difference between the GGA and experimental value or HSE06 methods was used as the

operation of a scissor to calculate optical properties. The cutoff energy of the plane wave was set to 850 eV. Self-consistent field (SCF) calculations were performed with a convergence criterion of  $10^{-6}$  eV/atom on the total energy. The  $k$ -point separation for each material was set as  $0.07 \text{ \AA}^{-1}$  in the Brillouin zone, resulting in the corresponding Monkhorst-Pack  $k$ -point meshes. The linear optical properties were obtained based on the dielectric function:  $\varepsilon(\omega) = \varepsilon_1(\omega) + i\varepsilon_2(\omega)$ . Where  $\varepsilon_1(\omega)$  and  $\varepsilon_2(\omega)$  are the real and imaginary parts of the dielectric function respectively. The imaginary part of the dielectric function  $\varepsilon_2$  can be calculated based on the electronic structures and the real part is obtained by the Kramers-Kronig transformation, accordingly, the refractive indices and the birefringence ( $\Delta n$ ) can be calculated.

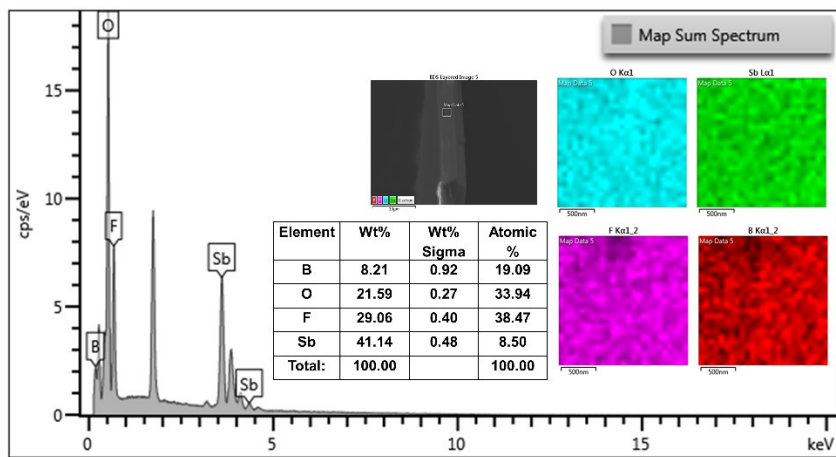

Fig. S1 EDS analysis of  $\text{SbB}_2\text{O}_4\text{F}$ .

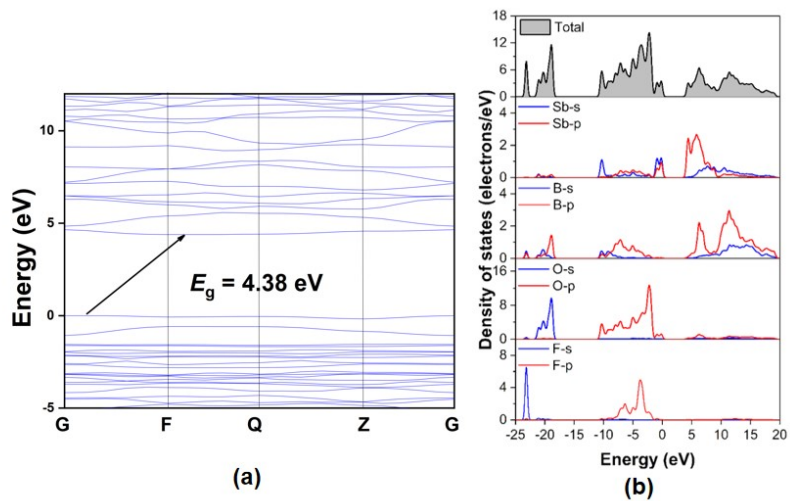

Fig. S2 The band structure(a) and density of states(b) of  $\text{SbB}_2\text{O}_4\text{F}$ .

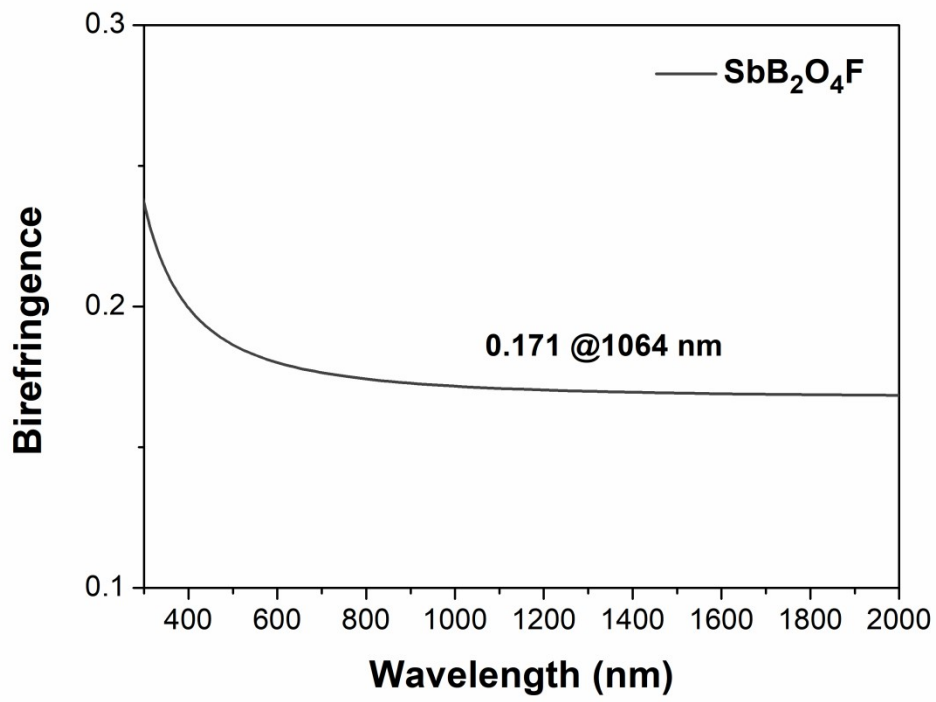

Fig. S3 The calculated birefringence of  $\text{SbB}_2\text{O}_4\text{F}$  crystal.

**Table S1.** Crystal data and structure refinements for SbB<sub>2</sub>O<sub>4</sub>F.

| <b>Empirical formula</b>                                                                                                                   | <b>SbB<sub>2</sub>O<sub>4</sub>F</b>                               |
|--------------------------------------------------------------------------------------------------------------------------------------------|--------------------------------------------------------------------|
| <b>Temperature (K)</b>                                                                                                                     | 300(2)                                                             |
| <b>Wavelength (Å)</b>                                                                                                                      | 0.71073                                                            |
| <b>Crystal system</b>                                                                                                                      | triclinic                                                          |
| <b>Space group</b>                                                                                                                         | $P\bar{1}$                                                         |
| <b>Formula weight</b>                                                                                                                      | 226.37                                                             |
| <b><i>a</i> (Å)</b>                                                                                                                        | 4.3436(7)                                                          |
| <b><i>b</i> (Å)</b>                                                                                                                        | 6.3169(10)                                                         |
| <b><i>c</i> (Å)</b>                                                                                                                        | 7.0009(12)                                                         |
| <b><math>\alpha</math> (°)</b>                                                                                                             | 92.888(8)                                                          |
| <b><math>\beta</math> (°)</b>                                                                                                              | 95.126(7)                                                          |
| <b><math>\gamma</math> (°)</b>                                                                                                             | 104.803(7)                                                         |
| <b>Z, Volume (Å<sup>3</sup>)</b>                                                                                                           | 2, 184.44(5)                                                       |
| <b><math>\rho_{\text{Calcd}}</math> (g/m<sup>3</sup>)</b>                                                                                  | 4.076                                                              |
| <b><math>\mu</math>(/mm)</b>                                                                                                               | 7.390                                                              |
| <b><i>F</i>(000)</b>                                                                                                                       | 204.0                                                              |
| <b><i>R</i>(int)</b>                                                                                                                       | 0.0919                                                             |
| <b>Goodness-of-fit on <i>F</i><sup>2</sup></b>                                                                                             | 1.169                                                              |
| <b>Final <i>R</i> indices<br/>[<i>F</i><sub>o</sub><sup>2</sup>&gt;2<math>\sigma</math>(<i>F</i><sub>o</sub><sup>2</sup>)]<sup>a</sup></b> | <i>R</i> <sub>1</sub> = 0.0630,<br><i>wR</i> <sub>2</sub> = 0.1626 |
| <b><i>R</i> indices (all data)<sup>a</sup></b>                                                                                             | <i>R</i> <sub>1</sub> = 0.0699,<br><i>wR</i> <sub>2</sub> = 0.1667 |
| <b>Largest diff. peak and hole (e<sup>-</sup>Å<sup>-3</sup>)</b>                                                                           | 2.790/-1.827                                                       |

<sup>[a]</sup>  $R_1 = \sum||F_o| - |F_c||/\sum|F_o|$  and  $wR_2 = [\sum w(F_o^2 - F_c^2)^2/\sum wF_o^4]^{1/2}$  for  $F_o^2 > 2\sigma(F_o^2)$ .

**Table S2.** Fractional atomic Coordinates ( $\times 10^4$ ) and equivalent isotropic displacement parameters ( $\text{\AA}^2 \times 10^3$ ) for

$\text{SbB}_2\text{O}_4\text{F}$ .  $U_{\text{eq}}$  is defined as 1/3 of the trace of the orthogonalised  $U_{ij}$  tensor.

| <b>Atom</b> | <b>x</b>  | <b>y</b> | <b>z</b> | <b><math>U(\text{eq})</math></b> | <b><math>BVS</math></b> |
|-------------|-----------|----------|----------|----------------------------------|-------------------------|
| Sb(1)       | 3818(3)   | 5996(2)  | 2930(2)  | 18(1)                            | 2.99                    |
| B(1)        | 10240(40) | -500(30) | 2880(30) | 10(4)                            | 3.03                    |
| B(2)        | 6100(50)  | 1720(40) | 2780(30) | 17(4)                            | 3.03                    |
| O(1)        | 9110(30)  | 1300(20) | 2930(20) | 25(3)                            | 2.00                    |
| O(2)        | 5810(30)  | 3460(20) | 4222(19) | 16(3)                            | 2.21                    |
| O(4)        | 3500(30)  | 9670(20) | 2961(18) | 16(3)                            | 2.01                    |
| O(3)        | 8260(30)  | 7430(20) | 2816(19) | 23(3)                            | 2.17                    |
| F(1)        | 5370(30)  | 2490(20) | 955(16)  | 24(3)                            | 0.67                    |



**Table S3.** Bond lengths for SbB<sub>2</sub>O<sub>4</sub>F.

| <b>Atom</b>  | <b>Length/Å</b> |
|--------------|-----------------|
| Sb(1)-O(2)   | 2.204(12)       |
| Sb(1)-O(2)#1 | 1.991(13)       |
| Sb(1)-O(3)   | 1.920(14)       |
| Sb(1)-O(4)   | 2.362(13)       |
| B(1)-O(1)    | 1.35(2)         |
| B(1)-O(4)#2  | 1.39(2)         |
| B(1)-O(3)#3  | 1.37(2)         |
| B(2)#4-O(4)  | 1.50(2)         |
| B(2)-O(1)    | 1.39(3)         |
| B(2)-O(2)    | 1.49(2)         |
| B(2)-F(1)    | 1.43(2)         |

Symmetry transformations used to generate equivalent atoms:

#1 -x+1,-y+1,-z+1 #2 x+1,y-1,z #3 x,y-1,z  
#4 x,y+1,z #5 x-1,y+1,z

**Table S4.** Bond angles for SbB<sub>2</sub>O<sub>4</sub>F.

| Atom               | Angle/°   |
|--------------------|-----------|
| O(3)-Sb(1)-O(4)    | 80.9(5)   |
| O(3)-Sb(1)-O(2)#1  | 92.7(5)   |
| O(3)-Sb(1)-O(2)    | 82.6(5)   |
| O(2)#1-Sb(1)-O(4)  | 83.5(5)   |
| O(2)-Sb(1)-O(4)    | 149.7(5)  |
| O(2)#1-Sb(1)-O(2)  | 72.0(5)   |
| O(3)#3-B(1)-O(4)#2 | 116.9(16) |
| O(1)-B(1)-O(4)#2   | 121.1(17) |
| O(1)-B(1)-O(3)#3   | 122.0(16) |
| F(1)-B(2)-O(4)#3   | 106.4(15) |
| F(1)-B(2)-O(2)     | 104.9(16) |
| O(2)-B(2)-O(4)#3   | 108.6(14) |
| O(1)-B(2)-O(4)#3   | 111.3(17) |
| O(1)-B(2)-F(1)     | 111.3(15) |
| O(1)-B(2)-O(2)     | 113.8(16) |

Symmetry transformations used to generate equivalent atoms:

#1 -x+1,-y+1,-z+1 #2 x+1,y-1,z #3 x,y-1,z

#4 x,y+1,z #5 x-1,y+1,z

**Table S5.** The optical properties of compounds with one-dimensional chains.

| Compound                                                         | 1D Chain Type                                           | Anionic framework                            | $E_g$ (eV) | $\Delta n$         |
|------------------------------------------------------------------|---------------------------------------------------------|----------------------------------------------|------------|--------------------|
| $\text{Li}_{0.5}\text{Na}_{0.5}\text{AlB}_2\text{O}_4\text{F}_2$ | $\text{BO}_3$                                           | $[\text{BO}_2]_\infty$                       | 6.04       | $\geq 0.110$       |
| <i>Cc</i> -BaBOF <sub>3</sub>                                    | $\text{BO}_2\text{F}_2$                                 | $[\text{BOF}_2]_\infty$                      | 6.42       | 0.020 <sup>a</sup> |
| $\text{BiB}_2\text{O}_4\text{F}$                                 | $\text{BO}_4+\text{BO}_3\text{F}$                       | $[\text{B}_6\text{O}_{10}\text{F}_2]_\infty$ | 4.43       | 0.018 <sup>a</sup> |
| BaAsBO <sub>5</sub>                                              | $\text{BO}_4$                                           | $[\text{BO}_3]_\infty$                       | 5.93       | 0.028              |
| $\text{Li}_2\text{B}_3\text{O}_4\text{F}_3$                      | $\text{BO}_3+\text{BO}_3\text{F}+\text{BO}_2\text{F}_2$ | $[\text{B}_3\text{O}_4\text{F}_3]_\infty$    | 8.43       | 0.050 <sup>a</sup> |
| $(\text{Pb}_4\text{O})\text{Pb}_2\text{B}_6\text{O}_{14}$        | $\text{BO}_3+\text{BO}_4$                               | $[\text{B}_6\text{O}_{14}]_\infty$           | 2.98       | 0.054              |

<sup>a</sup> The first principles calculation result.

## REFERENCES

- (1) Sheldrick, G. M. A Short History of SHELX. *Acta Crystallogr. A* **2008**, 64, 112-122.
- (2) Haming, L.; Sheldrick, G. M. SADABS: A Program For Exploiting The Redundancy of Area-Detector X-Ray Data. *Acta Crystallogr. A* **1999**, 55, No. 206.
- (3) Spek, A. L. Single-Crystal Structure Validation with the Program PLATON. *J. Appl. Crystallogr.* **2003**, 36, 7-13.
- (4) Brese, N. E.; O'Keeffe, M. Bond-valence Parameters for Solids. *Acta Crystallogr., Sect. B: Struct. Sci.* **1991**, 47, 192-197.
- (5) Clark, S. J.; Segall, M. D.; Pickard, C. J.; Hasnip, P. J.; Probert, M. I.; Refson, K.; Payne, M. C. First Principles Methods Using CASTEP. *Z. Kristallogr. - Cryst. Mater.* **2005**, 220, 567.
- (6) Kohn, W. Nobel Lecture: Electronic Structure of Matterwave Functions and Density Functionals. *Rev. Mod. Phys.* **1999**, 71, 1253.
- (7) Perdew, J. P.; Burke, K.; Ernzerhof, M. Generalized Gradient Approximation Made Simple. *Phys. Rev. Lett.* **1996**, 77, 3865.
- (8) Rappe, A. M.; Rabe, K. M.; Kaxiras, E.; Joannopoulos, J. D. Optimized Pseudopotentials. *Phys. Rev. B* **1990**, 41, 1227.
- (9) Heyd, J.; Scuseria, G. E.; Ernzerhof, M. Hybrid Functionals Based on a Screened Coulomb Potential. *J. Chem. Phys.* **2003**, 118, 8207-8215.
